# Supplementary material for: Carnivory in the Teasel Dipsacus fullonum — The Effect of Experimental Feeding on Growth and Seed Set
Source: PLoS One. 2011 Mar 18;6(3):e17935. doi: 10.1371/journal.pone.0017935 (PMC3060873; doi:10.1371/journal.pone.0017935)
Supplement: Table S1 — Raw data on biomass and seed mass described in the text, with metadata defining each plant's location, feeding treatment and watering treatment. (XLS) [file pone.0017935.s001.xls]

## Sheet: metadata
data on above-ground biomass
and seed set from teasels Dipsacus fullonum
on Wimbledon common, London, UK
given supplementary feeding and watering treatements
May-August 2009
Site	No. leaves	Size class	Maggot treatment	Water treatment	seeds (g)	biomass (g)
1 = TQ2284073116	in basal rosette January 2009	above or below median number of rosette leaves of its local population	0 = control	0 = control	105C dry mass of all seeds from each plant	105C dry mass, above-ground only and excluding seeds
2 = TQ2284072823			1 = removal	1 = removal
			2 = addition

## Sheet: shawShackletonTeaseldata
Plant number	Site	No. leaves	Size class	Maggot treatment	Water treatment	seeds (g)	biomass (g)
1	1	12	1	0	1	3.34	20.03
2	1	17	2	1	0	1.51	25.39
3	1	10	1	1	1	0.17	6.3
4	1	20	2	0	1	2.2	58.8
5	1	16	2	2	0	2	16.95
6	1	18	2	1	0	1.6	36.38
7	1	18	2	2	0	4.35	29.35
8	1	12	1	1	1	0.26	5.79
9	1	12	1	0	1	0.66	6.1
10	1	20	2	2	1	2.41	39.7
11	1	16	1	2	0	2.92	21.63
12	1	14	1	2	1	3.01	16.39
13	1	12	1	2	1	2.18	15.49
14	1	14	1	1	1	2.06	22.49
15	1	16	2	1	0	2.84	24.57
16	1	19	2	0	1	7.47	49.07
17	1	14	1	2	0	1.59	19.03
18	1	13	1	1	0	1.19	6.76
19	1	17	2	1	1	3.75	24
20	1	18	2	0	0	5.3	36.04
21	1	14	1	1	0	1.54	29.7
22	1	13	1	0	0	2.15	13.62
23	1	15	1	0	1	0.77	17.65
24	1	16	2	2	1	1.9	20.25
25	1	25	2	1	1	4.51	74.86
26	1	20	2	0	0	1.69	22.56
27	1	22	2	1	1	3.78	39.75
28	1	14	1	2	1	1.13	12.46
29	1	16	2	2	1	0.67	14.22
30	1	14	1	0	0	1.18	13.54
31	1	14	1	2	0	1.47	15.32
32	1	16	1	1	0	0.58	18.77
33	1	17	2	0	1	4.11	43.41
34	1	19	2	2	0	6.21	36.79
35	1	18	2	0	0	0.81	20.3
36	1	12	1	0	0	0.82	9.14
1	2	36	2	1	0	8.6	299.57
2	2	26	1	1	1	1.91	87.61
3	2	28	2	2	0	25.6	264.88
4	2	40	2	1	1	16.41	279.78
5	2	18	1	0	1	8.3	87.3
6	2	36	2	1	1	23.55	319.6
7	2	17	1	1	0	6.67	71.83
8	2	14	1	0	0	2.25	51.62
9	2	26	1	0	0	10.63	111.68
10	2	40	2	0	1	16.32	239.68
11	2	22	1	1	0	6.33	65.55
12	2	30	2	2	0	35.27	278.43
13	2	42	2	1	1	43.97	321.34
14	2	27	2	2	1	29.83	178.92
15	2	40	2	0	0	17.61	160.71
16	2	20	1	2	1	9.31	71.33
17	2	42	2	2	1	30.66	293.7
18	2	16	1	2	0	6.65	66.73
19	2	20	1	1	1	4.37	77.62
20	2	38	2	0	0	8.31	137.85
21	2	31	2	0	0	0.4	36.91
22	2	34	2	0	1	10.11	171.35
23	2	40	2	1	0	6.65	181.02
24	2	44	2	2	1	13.85	282.16
25	2	14	1	1	1	5.44	54.37
26	2	26	2	0	1	9.26	137.14
27	2	11	1	0	1	0.07	21.24
28	2	24	1	0	0	12.12	68.98
29	2	18	1	1	0	11.62	87.2
30	2	14	1	2	1	10.84	78.24
31	2	26	2	1	0	15.23	114
32	2	18	1	0	1	7.6	80.05
33	2	16	1	2	1	10.39	80.08
34	2	28	2	2	0	19.49	137.58
35	2	24	1	2	0	10.41	91.34
36	2	24	1	2	0	7.65	89.24
